# Supplementary material for: Binuclear half-metallocene chromium(iii) complexes mediated ethylene polymerization with alkylaluminium as cocatalyst
Source: Royal Society of Chemistry journal article supplement (doi:10.1039/c1dt10803d), 2011-01-01
Supplement: c1dt10803d.pdf [file c1dt10803d.pdf]

## Supporting Information

for

### **Binuclear Half-metallocene Chromium(III) Complexes Mediated Ethylene Polymerization with Alkylaluminum as Cocatalyst**

**Tieqi Xu\*, Yu Pan and Xiao-Bing Lu\***

*State Key Laboratory of Fine Chemicals, College of Chemistry, Dalian University of  
Technology, Dalian 116024, China*

**Table S1.** Results of ethylene polymerization using precatalysts **1**<sup>a</sup>

| Run            | Precatalyst<br>( $\mu\text{mol}$ ) | Al/Cr | Yield<br>(g) | Activity <sup>b</sup> | $M_w^c \times 10^{-4}$ | $M_w/M_n^c$ | Tm <sup>d</sup><br>( $^{\circ}\text{C}$ ) |
|----------------|------------------------------------|-------|--------------|-----------------------|------------------------|-------------|-------------------------------------------|
| 1              | 1(1)                               | 50    | 1.32         | 1320                  | 17.1                   | 2.79        | 136.9                                     |
| 2              | 1(1)                               | 100   | 1.03         | 1030                  | 19.4                   | 2.84        | 137.9                                     |
| 3 <sup>e</sup> | 1(1)                               | 25    | 1.06         | 1060                  | 16.8                   | 2.85        | 137.8                                     |
| 4 <sup>f</sup> | 1(1)                               | 25    | 0.93         | 930                   | 16.5                   | 2.86        | 137.6                                     |
| 5 <sup>g</sup> | 1(1)                               | 25    | 0.52         | 520                   | 14.2                   | 2.86        | 137.5                                     |
| 6 <sup>h</sup> | 1(1)                               | 25    | 0.32         | 320                   | 13.6                   | 2.71        | 137.4                                     |

[a] Polymerization conditions: solvent 80 mL of toluene, temperature 20  $^{\circ}\text{C}$ . ethylene pressure 5 bar, time 30 min. [b] kg PE (mol Cr)<sup>-1</sup> h<sup>-1</sup>. [c] Measured by GPC analysis. [d] Determined by DSC at a heating rate of 10  $^{\circ}\text{C}$  min<sup>-1</sup>. [e] Temperature 40  $^{\circ}\text{C}$ . [f] Temperature 60  $^{\circ}\text{C}$ . [g] Et<sub>3</sub>Al as cocatalyst. [h] <sup>i</sup>Bu<sub>3</sub>Al as cocatalyst.

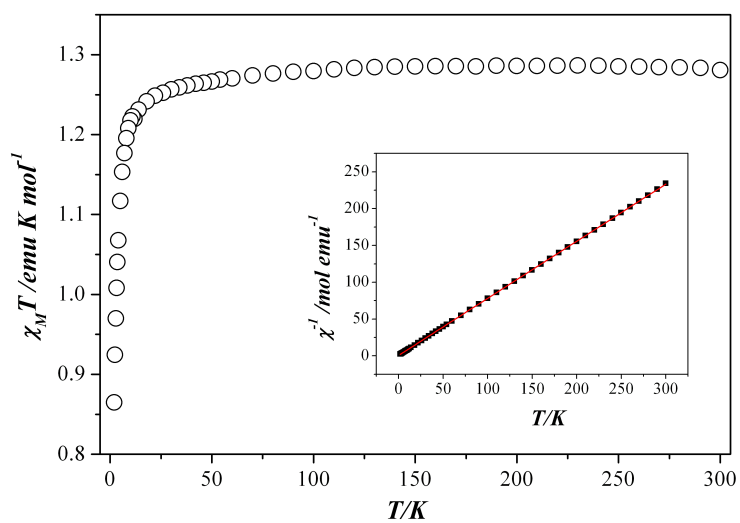

**Fig. S1** The temperature dependence of reciprocal magnetic susceptibility  $\chi_M^{-1}$  (square) and the product  $\chi_M T$  (circle) for complex **6**.
